# Using remotely delivered Spring Forest Qigong™ to reduce neuropathic pain in adults with spinal cord injury: Protocol of a quasi-experimental clinical trial

Ann Van de Winckel, PhD, MSPT, PT<sup>1</sup>; Sydney Carpentier, BA<sup>2</sup>; Wei Deng, BS<sup>2</sup>; Lin Zhang, PhD<sup>3</sup>; Ricardo Battaglino, PhD<sup>4</sup>; Leslie Morse, DO<sup>4</sup>

<sup>1</sup> Division of Physical Therapy, Division of Rehabilitation Science, Department of Rehabilitation Medicine, Medical School, University of Minnesota, USA

<sup>2</sup> Division of Rehabilitation Science, Department of Rehabilitation Medicine, Medical School, University of Minnesota, USA

<sup>3</sup> Division of Biostatistics, School of Public Health, University of Minnesota, USA

<sup>4</sup> Department of Rehabilitation Medicine, Medical School, University of Minnesota, USA

**WORD COUNT: 3995**

**ORCID ID:**

Ann Van de Winckel: 0000-0001-8400-3177

Sydney Carpentier: 0000-0003-2398-085X

Wei Deng: 0000-0002-7933-389X

Lin Zhang: 0000-0002-0003-6084

Ricardo Battaglino: 0000-0002-0272-1763

Leslie Morse: 0000-0002-7426-6341

23    **CORRESPONDING AUTHOR:**

24    Dr. Ann Van de Winckel, PhD, MSPT, PT

25    Division of Physical Therapy, Division of Rehabilitation Science, Department of

26    Rehabilitation Medicine, Medical School, University of Minnesota, 420 Delaware St SE

27    (MMC 388), Rm 311, Minneapolis, MN 55455; Phone: 612-625-1191; Fax: 612-625-

28    4274; E-mail: [avandewi@umn.edu](mailto:avandewi@umn.edu)

## **Abstract**

### ***Introduction***

About 50% of Americans living with spinal cord injury (SCI) suffer from long-term debilitating neuropathic pain, interfering with the quality of daily life. Neuropathic pain is refractory to many available treatments –some carrying a risk for opioid addiction– highlighting an urgent need for new treatments. In this study, we will test our hypothesis that Spring Forest Qigong will reduce SCI-related neuropathic pain by improving body awareness. We will determine whether remotely delivered Qigong is feasible and whether it reduces neuropathic pain (primary outcome). We will also determine whether it reduces spasms frequency and/or severity, and improves functional performance, mood, or body awareness (secondary outcomes).

### ***Methods and analysis***

In this quasi-experimental pilot clinical trial study, adults with SCI will practice Qigong at home with a 45min video, at least 3x/week for 12 weeks. The Qigong practice includes movements with guided breathing and is individualized based on functional abilities, i.e., the participants will do kinesthetic imagery of Qigong movements with guided breathing, for movements that they are unable to perform actively. The primary clinical outcome –the highest, average, and lowest neuropathic pain ratings perceived in the prior week– will be recorded weekly throughout the study period. The secondary outcomes will be collected at 4 time points: at baseline, midway during the Qigong intervention (6 weeks), after the Qigong intervention (12 weeks), and after the 6-week follow-up. The data will be analyzed with a repeated measure ANOVA and with Tukey post-hoc tests.

51 ***Ethics and dissemination***

52 The University of Minnesota (UMN)'s Institutional Review Board (IRB) approved the  
53 study (IRB #STUDY00011997). All participants will sign electronic informed consent on  
54 the secure UMN REDCap platform. The results will be presented at academic  
55 conferences and published in peer-reviewed publications.

56 **ClinicalTrial.gov registration number:** NCT04917107.

57

58 **Keywords:** spinal cord injury; neurological pain; spasms; function; Qigong; body  
59 awareness

60

61

## ARTICLE SUMMARY

### Strengths and limitations of this study

- This is the first pilot clinical trial study using Remotely delivered Qigong for neuropathic pain relief in adults with SCI. Data are collected before, and after the intervention as well as after a 6-week follow-up period.
- This study will provide evidence on the feasibility of remotely delivered Qigong and whether Qigong practice reduces neuropathic pain, and as secondary outcomes, reduces spasms, improves functional performance, mood, or body awareness.
- Adults with SCI-related neuropathic pain were involved in the design of this study.
- We did not include a sham version of Qigong and, because there is no group allocation, the assessor, participant, or analyst are not blinded.
- Because of the relatively small sample size in this study, validation of positive results will need to be validated in a larger sample size, include a control group, and provide a longer follow-up period to address the longer-term duration of the effects.

## INTRODUCTION

About 50% of the 294,000 Americans living with spinal cord injury (SCI) suffer from debilitating neuropathic pain, interfering with general activity, mobility, mood, sleep, and quality of life.[1–3] Yet, neuropathic pain is refractory to many treatments, and some medications carry a risk for opioid addiction, highlighting a need for new treatments.[4]

Neuropathic pain in adults with SCI has been attributed to altered pain processing-related brain function.[5–7] Due to this alteration, there is a disconnect between the sensory information that the brain is expecting to receive and the interpretation of the missing or incorrect sensory information that the brain actually receives. The brain uses a prediction framework in which predictions of sensory input are compared to actual sensory input. In adults with SCI, the disruption of sensory inflow is compensated for by upregulating the residual sensory inflow (or, in the case of complete injury, spontaneous noise fluctuations). In addition to an increase in sensory signals, attention and body awareness serve as a sophisticated integrative mechanism that typically adapts well to changes in peripheral signals. However, in adults with SCI, these adaptations can “get stuck” such that the sensory signal is not spontaneously recalibrated but might give rise to chronic phantom-like percepts. This disconnect leads to altered brain circuitry related to sensory information.[5,6,8,9] Because sensory information includes increased pain sensation, the disconnect, in turn, drives the neuropathic pain perception.[5,6,8,9] Concurrently, recent studies showed that SCI-related brain alterations impact body awareness in addition to pain perception.[10–13]

Mind and body approaches –known for training body awareness– have been shown to reduce pain in populations with chronic low back pain and fibromyalgia, but evidence of its effectiveness in adults with SCI is limited.[14–22] Adaptive Yoga vs. waitlist group decreased depression and improved self-compassion, but not pain in adults with SCI. [21] A seated Tai Chi program (single-arm study) was well-tolerated in adults with SCI, reduced pain, and improved emotional and physical well-being immediately after each session.[22] However, the weekly in-person classes were associated with a 60% drop-out, and only included adults with paraplegia were included. While these are promising results, more studies are needed.

Qigong –a mind and body approach that incorporates gentle body movements, paired with a focus on breathing and body awareness to promote health and wellness– is accessible for adults with SCI due to the simple, gentle movements, which can be done in a sitting or lying position or by doing kinesthetic imagery of the movements when active movements are not possible.[17,23] Practicing Qigong has been recognized to improve posture, body awareness, and emotional balance.[17] Some Qigong programs are available online, which helps make the practice accessible for adults with SCI with transportation issues or who live too far away from Qigong centers.

In this quasi-experimental study, we will test our hypothesis that the remotely delivered Qigong will reduce SCI-related neuropathic pain by improving body awareness. If our hypothesis is validated, the outcome of our work will be the first step in demonstrating a potentially effective therapy for adults with SCI-related neuropathic pain. To test this hypothesis, we will determine whether 12 weeks of remote Qigong is

feasible and well-tolerated and whether it reduces neuropathic pain in adults with SCI. Given the reported associations with pain, we will assess whether Qigong practice reduces spasms frequency and/or severity, and improves function, mood, and body awareness as secondary outcomes.

## METHODS AND ANALYSIS

### Study design

The study flow chart of this quasi-experimental pre-post design is presented in **Figure 1**. Participants with SCI-related neuropathic pain and with complete or incomplete paraplegia or tetraplegia will perform 12 weeks of “Five Element Qigong Healing Movements of Spring Forest Qigong” with an online video at home, at least 3x/week, 41 min/session. *Individual weekly check-ins* (15-30min) are organized during the Qigong practice to address questions and demonstrate movements over Zoom if needed. Qualitative information will be collected about their adherence, adverse outcomes if any, perceptions, effects, and satisfaction with the Qigong practice. During the whole study period, we will record weekly the highest, average, and lowest neuropathic pain intensity ratings perceived in the prior week (primary outcome), the dose of neuropathic pain medication, recent illnesses, health care utilization, and/or recent hospitalizations, and any activity that would indicate community integration. The secondary outcomes will be collected at 4 time points: at baseline, midway during the Qigong intervention (6 weeks), after the Qigong intervention (12 weeks), and after



the 6-week follow-up. During the 6-week follow-up, participants will not practice Qigong but receive regular standard of care as needed. Participants will receive \$100 upon study completion, through a Greenphire ClinCard. The Qigong introduction class and video access will be paid for by the study. Participants will be encouraged to complete all scheduled virtual visits and assessments. Given that this study is conducted during the COVID-19 pandemic, we estimate 90% adherence and 30% attrition given a high likelihood of some participants being exposed to COVID-19 during the study. If an assessment or weekly check-in is missed, care will be taken to get the information at a later time. There are no stop criteria for missed sessions or testing. The study team will decide when to consider a participant “lost to follow-up” based on clinical/scientific judgment on a case-by-case basis. Missed testing sessions will be recorded for consideration during the analysis but will not be cause for removal from the study.

## Participants

From July 1, 2021, until July 1, 2023, we plan on recruiting 23 adults with SCI-related neuropathic pain, who are 18–75 years old, with SCI of  $\geq 3$  months, medically stable with complete or incomplete paraplegia (T1 and below) or tetraplegia (C4 and below), and with the highest level of SCI-related neuropathic pain  $\geq 3$  on the Numeric Pain Rating Scale.[24]

We estimate the average age of participants to be 43 years old.[25], and the sex ration to be 4:1 (men:women).[4,25] About 24% of SCI occur among non-Hispanic Blacks.[4,25] Given the small sample size, and the fact that Minnesota has a 79.10% non-Hispanic white population and 7.00% non-Hispanic Blacks,[26] we may not be able to investigate the effects of sex or race. The exclusion criteria are uncontrolled seizure disorder; cognitive or communicative impairments that prevent participants from following directions or learning; ventilator dependency; other major medical complications; treatments for neuropathic pain other than medication.

## **Patient and public involvement**

Adults with SCI-related neuropathic pain living in the community were invited to share their perception of 'priority research' (in this case, treatments for neuropathic pain that are not pharmaceutical or invasive), relevant outcomes (listed in this study), assessment, and study duration. They preferred remote interventions because many adults with SCI have transportation issues and some live rurally or out of state.

## **Sample size calculation**

To our knowledge, this will be the first study evaluating the feasibility and effects of Qigong on neuropathic pain perception. This study will provide preliminary estimates of effect size, crucial to generate hypotheses for future larger randomized controlled trials. We conducted a preliminary power calculation for the given sample size based on estimates from another body awareness therapy in adults with SCI (currently

unpublished). In this prior study, we saw a reduction in neuropathic pain intensity of *at least*  $2.31 \pm 2.07$  points for the highest, average, and lowest neuropathic pain in the prior week. Assuming the same standard deviation estimate, a total of 23 participants will have 99% power to detect the same pain reduction of 2.31 points on the numeric pain rating scale (standardized Cohen's  $d = 1.11$ ) with a two-sided significance level of 0.05 using a paired  $t$ -test, and 80% power to detect a pain reduction of 1.45 points (Cohen's  $d=0.7$ ) in this study. With an attrition rate of 30%, the planned sample size will still have 80% power to detect a pain reduction of 1.57 points (Cohen's  $d=0.76$ ).

## **Participant recruitment, sampling design, eConsenting**

Participants will be recruited in outpatient locations within the newly funded Spinal Cord Injury Model System Center (Minnesota Regional Spinal Cord Injury Model System) and the community. Specifically, we have collaborators within the Minneapolis VA Health Care System including the Minnesota Paralyzed Veterans; University of Minnesota Medical Center, M Health Fairview (Minneapolis); MN SCI associations; Regions Hospital; Courage Kenny Rehabilitation Institute; Get Up Stand Up To Cure Paralysis; Unite2fight paralysis, and Fit4Recovery.

We will use volunteer sampling through fliers, and post study-relevant information on social media and relevant websites. We will also use convenience sampling by having the health care providers in hospitals and organizations provide enrollment information and materials to potential participants.

Eligible participants will have a virtual visit through the University of Minnesota's secure Zoom conference ability with the study staff to review and address questions about the combined HIPAA/informed eConsent. The consent will be signed through a University of Minnesota Research Electronic Data Capture (REDCap) link. REDCap uses a MySQL database via a secure web interface with data checks to ensure data quality during data entry. All IRB rules and HIPAA rules protecting the participants' rights and confidentiality of records will be followed.

The study staff member will acquire demographic information and general health history and screen participants for cognitive ability with the Mini-Mental State Examination-short version.[27] and for kinesthetic imagery with the Kinesthetic and Visual Imagery questionnaire.[28] All data in this study will be entered into the REDCap database.

# **Data collection and intervention procedures**

The scheduling of assessments and timeline of each study section is displayed in **Table 1**.

**Table 1. Scheduling of enrolment, intervention, and assessments**

|                    | STUDY PERIOD                          |                               |         |                                                         |
|--------------------|---------------------------------------|-------------------------------|---------|---------------------------------------------------------|
|                    | Enrolment +<br>BASELINE<br>assessment | Intervention +<br>Assessments |         | Follow-up<br>period (no<br>intervention) +<br>close-out |
| TIMEPOINT          | Week 0                                | Week 6                        | Week 12 | Week 18                                                 |
| ENROLMENT:         |                                       |                               |         |                                                         |
| Eligibility screen | X                                     |                               |         |                                                         |

|                                                                  |   |               |               |               |
|------------------------------------------------------------------|---|---------------|---------------|---------------|
| <b>eConsent</b>                                                  | X |               |               |               |
| <b>INTERVENTION:</b>                                             |   |               |               |               |
| <b><i>Qigong practice<br/>12 weeks, at least<br/>3x/week</i></b> |   | X             | X             |               |
| <b>ASSESSMENTS:</b>                                              |   |               |               |               |
| <b><i>Demographic and<br/>general health data</i></b>            | X |               |               |               |
| <b>Weekly primary<br/>outcome<br/>assessments</b>                | X | X<br>(weekly) | X<br>(weekly) | X<br>(weekly) |
| <b><i>Secondary outcome<br/>assessments</i></b>                  | X | X             | X             | X             |

## Qigong intervention

A Qigong Master from the Spring Forest Qigong Center (Minnesota) will teach the introductory class of the “Five Element Qigong Healing Movements” (6h) over Zoom. These movements can be done lying or sitting and/or through kinesthetic imagery, and thus, they are suitable for adults with SCI with paraplegia or tetraplegia.[17,23]

The participants will be instructed to actively move however much they comfortably can and perform kinesthetic imagery of the Qigong movements. The instructions of the kinesthetic imagery are to focus on imagining the feeling of performing the entire whole-body movement standing up while focusing on breathing and body awareness and to imagine the ‘feeling’ of the contact of the floor with the soles of their feet, rather than to ‘visualize’ the whole-body movement. If reproducing this feeling is difficult, participants will be asked to associate positive memories from before their SCI with this imagined

standing posture, e.g., the memory of feeling the warm sand under the soles of their feet on the beach or the feeling of grass under the soles of bare feet in the garden.

After the introductory class, participants will receive a password-protected website link to practice for 12 weeks. Because of the low-intensity Qigong movements or kinesthetic imagery, we anticipate that this trial will be safe and well-tolerated. Thus, we do not anticipate terminating the trial due to safety or tolerability issues.

**To address the feasibility outcome**, the Qigong website automatically monitors the days and duration that videos are accessed, which allows us to objectively track adherence. The Spring Forest Qigong center will provide the weekly logs to the principal investigator. Since participants will log in with their ID code given at the start of the study, no personal information is transmitted to the website or the center.

**Qigong Practice:** Qigong Master Chunyi Lin, MS in holistic healing, developed the video “Five Element Qigong Healing Movements”, and guides the participant on the online video through each of the five gentle horizontal and vertical arm and leg movements performed with guided breathing.[15,29] As defined by Traditional Chinese Medicine, each of the five movements connects to a specific natural element (Fire, Earth, Metal, Water, and Wood). Each element is associated with two meridians, with a specific organ system, and with specific emotions, which have a positive and negative counterpart. When practicing the Five Element Qigong Healing Movements, the focus is directed only on positive emotions. The explanation of the five movements (**Figure 2**) is detailed below.[29]

*Preparation phase:* The practice starts with smiling and focusing on the heart. The participants bounce for one minute with their arms relaxed next to the body, and another minute with their arms in the air. Master Lin then guides the participants through various cupping and tapping movements to open the energy channels related to each of the five organ systems. The preparation phase ends with setting an intention for healing. Then the five movements are performed for 5 minutes each.

*Movement 1: Moving of Yin and Yang.* This movement helps the liver system and is connected to the Wood element. The liver system is associated with the emotion of happiness (or its negative counterpart: anger). Movement 1 is performed by using the elbows to have the arms make an elliptical movement. The movement starts by moving the right hand out and down to the bottom of the torso, while the left hand moves in (closer to the body) and up to the face. While doing this movement, the focus is on the emotion of happiness and body sensations. After five minutes, the hands are brought down in front of the Lower Dantian, which is an energy center about the width of 3 thumbs below the navel and 3 thumbs inward. The participants focus on the Lower Dantian and take a deep breath three times.

*Movement 2: Breathing of the Universe.* This movement helps the heart system and is connected to the Fire element. The heart system is associated with the emotion of joy (or its negative counterpart: hatred). After Movement 1, on the 4<sup>th</sup> breath, the participants inhale, bend their knees and open their hands to the sides. With the exhale, the hands come closer again and the participants straighten their body again. Participants focus on the emotion of joy and body sensations.

*Movement 3: Connecting with Heaven & Earth.* This movement helps the stomach and spleen systems and is connected to the Earth element. The stomach and spleen systems are associated with the emotion of peace and groundedness (or its negative counterpart: anxiety and thinking). Movement 3 activates the triple heater, which is an energy system that helps the internal organs, glands, and the lymph system. After Movement 2, the participants lower their hands to their sides and then move their hands up from both sides in the same way as they would hold a ball above their head. The hands are kept above the head during the entire duration of this movement. The participants inhale and bend their knees to lower the body slowly. As they exhale, they straighten their body. Participants focus on the emotion of peace and groundedness and body sensations.

*Movement 4: Connecting with Your Body's Energy.* This movement helps the lung system and is connected to the Metal element. The lung system is associated with the emotion of contentment (and its negative counterpart: depression and sadness). Movement 4 directs energy to a point called Hui Yin at the center of the pelvic floor, ½ inch in front of the anus. This is where the female energy channels gather together. Performing this movement is beneficial for the reproductive organs in women and prostate function in men. The participants bring both hands down and connect the tips of their fingers forming a heart shape in front of their navel. The participants keep a light pressure on the tips of their fingers to stimulate the heart's energy. The participants bend the knees while keeping the spine and shoulders relaxed and straight and then spread the legs slightly by moving the right foot half a step out. While participants



inhale, they shift the body weight to the left, putting 70% of the weight on the left leg and holding this position for three seconds. As they exhale, they switch the body weight and put 70% of the weight on the right leg. They hold this position for three seconds. The participants keep shifting their body weight in this way from side to side. During this movement, participants focus on the emotion of contentment and their body sensations.

*Movement 5: Connecting with Your Heart's Energy.* This movement helps the kidney system and is connected to the Water element. The kidney system is associated with the emotion of gratitude and thankfulness (and its negative counterpart: fear).

Movement 5 helps to move energy to the Bai Hui point on the top of the head. The participants adjust their feet so they are standing with the feet shoulder-width apart. They put the hands together palm to palm in front of the chest while keeping a light pressure on the fingertips to stimulate the heart's energy. During the inhalation, the participants slowly bend forward at the waist. This is a small movement. With the exhale, the participants straighten back up. While doing this movement the participants focus on the emotion of gratitude and body sensations.

*The Ending: Harvesting of Qi.* The participants rub the hands together, palm to palm, and then massage the face and ears, comb through the hair, followed by cupping and tapping parts of the body. They then make gentle dolphin movements with the neck and body, and after more cupping, the practice ends by lifting and dropping the heels nine times.

## **Outcome measures**

*Primary outcome measure: Intensity of neuropathic pain in the prior week*

Our primary behavioral outcome—the highest, average, and lowest neuropathic pain intensity ratings perceived in the prior week—will be recorded using the 0-10 Numerical Pain Rating Scale with 0 being no pain and 10 being the worst pain ever.[24] This scale has been recommended by the mission of the Initiative on Methods, Measurement, and Pain Assessment in Clinical Trials consensus group for use in pain clinical trials and by the 2006 National Institute on Disability and Rehabilitation Research SCI Pain outcome measures consensus group.[30,31]

*Secondary outcome measure*

*Location and impact of neuropathic pain; spasms frequency and severity:* Other pain data will be collected using the National Institute of Neurological Disorders-Common Data Elements International SCI Pain Basic Data Set Version 2.0.[32] This Data Set also assesses dimensions of pain (i.e., the intensity of pain, location, etc.), and how pain interferes with mood, activity, and sleep. The Brief Pain Inventory elicits self-report of pain intensity and its impact on functioning in the past 24h.[31] Spasms frequency and spasm severity will be evaluated with the Penn Spasm Frequency Scale.[33]

*Mood:* The Patient Health Questionnaire-9 assesses symptoms of depression.[34–38] The State-Trait Anxiety Inventory assesses current symptoms of anxiety (State anxiety) and a generalized propensity to be anxious (Trait anxiety).[39]

*Quality of life:* The World Health Organization Quality of Life Instruments (abbreviated version) assesses physical and psychological health, social relationships,

and environment.[40–42] The Satisfaction with Life Scale assesses a person's happiness with the current quality of life.[43] The Moorong Self-Efficacy Scale assesses self-efficacy related to everyday life activities in adults with SCI.[44–46] The Pittsburgh Sleep Quality Index assesses sleep quality.[47]

*Body awareness:* The Revised Body Awareness Rating Questionnaire assesses how pain or tension in the body is affecting participants' awareness and function in daily life (e.g., being comfortable when lying down).[48] The Postural Awareness Scale measures awareness of body posture in patients with chronic pain.[49] The Functional Appreciation Scale measures the level of appreciation one has for the functionality of the body.[50] The Multidimensional Assessment of Interoceptive Awareness measures interoceptive body awareness.[51] The Body perception questionnaire-short form measures interoceptive awareness and autonomic reactivity.[52,53] Participants self-report whether their cardiopulmonary system, bladder, bowel, and sexual function are normal or abnormal with the Autonomic Standards Assessment Form.[54]

*Function.* The Spinal Cord Injury Functional Index[55] measures functional performance across 5 domains: basic mobility, self-care, fine motor function, wheelchair mobility, and/or ambulation.[56] For the Patient Specific Functional Scale,[57] the participants will self-identify goals related to activities in daily life that are important to them. The participants will rate them at each time point between 0 (i.e., unable to do the activity without pain) and 10 (able to do the activity without pain).[57] For the Physical activity 3-day recall questionnaire, the participants describe all activities performed during the past 3 days.[58,59]

*Fear of injury due to movement:* The Tampa Scale for Kinesiophobia assesses fear of injury due to physical movement.[60]

*Community integration:* The Craig Handicap Assessment and Reporting Technique–Short Form is used to assess community integration.[61]

## **Statistical analysis**

All analyses will be done using standard statistical software including SAS, Stata, and R. The data analysis from this feasibility study will provide an estimate of key trial elements to determine whether to proceed to a larger definitive RCT. Both Intent-to-Treat (ITT) and per-protocol (PP) analyses will be conducted, where ITT population is defined as all participants that are enrolled in the study, and PP population is defined as all participants who are enrolled and strictly adhere to the protocol. Descriptive statistics and percentages will be calculated for nominal and continuous demographic data and feasibility outcomes. The data will be transformed appropriately to ensure at least approximate normal distributions. Missing data will be handled using the multiple imputation and inverse probability weighting approaches.

For each of the primary and secondary endpoints, longitudinal models with mixed effects will be used to test the effect of Qigong practice on changes in pain and behavioral outcomes, which will include the subject-level effect, time, time-dependent treatment indicator as predictors as well as adjust for age, race, and other covariates as appropriate. Adults with SCI are heterogeneous in injury level, completeness, time since injury, age, and sex. The within-subject design is powerful as it eliminates variations due

to between-subject heterogeneity, though the success of Qigong may depend on injury levels and completeness. Thus, we will explore and describe these factors as potential confounders in the linear model.

The behavioral data will also be analyzed using a repeated measure ANOVA, with Tukey post hoc tests to evaluate changes between each time point, or the Friedman test with non-parametric post-hoc tests if the data are not normally distributed.

## DISCUSSION

About 50% of Americans with SCI experience debilitating neuropathic pain, interfering with daily life.[3] Available treatments provide insufficient pain relief.[4] Prior research has proposed that the development and intensification of SCI-related neuropathic pain is dependent on brain reorganization associated with dysfunctional multisensory integration processes, as well as distorted body perception and representation.[10–13] Mind and body approaches, such as Qigong, train body awareness and reduce chronic pain, but evidence-based research on its use for SCI-related neuropathic pain is limited.[14–22]

Therefore, in this quasi-experimental study, we will test our hypothesis that Spring Forest Qigong's Five Element Qigong Healing Movements will reduce SCI-related neuropathic pain by improving body awareness. To our knowledge, this will be the first study using Qigong for neuropathic pain relief in adults with SCI. This study will provide preliminary evidence-based data on the feasibility of remotely delivered Qigong and whether Qigong practice reduces neuropathic pain and pain-related secondary

outcomes. The remote delivery of Qigong offers multiple applications for broad use in the home or community.

There are some limitations to this study. This quasi-experimental study will be conducted on a limited sample size and thus the results will need to be validated in a larger sample size and compared to a control group. The follow-up period is 6 weeks, which means that longer-term effects cannot be observed. Nevertheless, the data from the present work will inform the design of future randomized controlled trials with adequate sample size, intervention dosage, and follow-up duration.

## **ETHICS AND DISSEMINATION**

We will adhere to the ethical guidelines of the Declaration of Helsinki. The University of Minnesota's Institutional Review Board (IRB) approved the study (IRB#STUDY00011997). The study is registered at ClinicalTrial.gov: NCT04917107.

The results will be presented at conferences and in peer-reviewed publications, in which we will acknowledge the stakeholders' contributions. Data will be stored in the Dryad repository of the University of Minnesota. We will use our existing community connections at the University of Minnesota to disseminate information, spread awareness of Qigong and the results, and hold dialogues with stakeholders. This study will help us design future larger studies, strengthen our funding proposals, and provide us with a platform to educate consumers, caregivers, and providers locally and nationally.

## **AUTHOR CONTRIBUTIONS**

AVDW, LM, and RB were responsible for the conception and design of the work in collaboration with adults with SCI-related neuropathic pain. AVDW is the principal investigator of the study, oversees, and manages the study. AVDW also communicates with the University of Minnesota's Clinical and Translational Science Institute (CTSI)'s monitor every 6 months and submits protocol modifications to relevant parties. LM is overseeing participant recruitment. LZ is responsible for the statistical analysis. AVDW, SC, and WD will collect the data.

AVDW wrote the original draft. All authors contributed substantially to parts of the manuscript, critically revised it for content, approved the final version, and agreed to be accountable for the accuracy and integrity of this work.

## **ACKNOWLEDGMENTS**

We thank Master Chunyi Lin, MS, and Master Jaci Gran from the Spring Forest Qigong for their consultancy and assistance with providing the content of the 5 Element Qigong Healing Movements protocol. We thank the adults with SCI and neuropathic pain who gave their valuable input on the research questions, intervention, assessments, and elements of the study design. We present our profound thanks to Marc Noël for the critical review of the manuscript.

## **COMPETING INTEREST STATEMENT**

The authors have no conflict of interest to declare.

453

454 **FUNDING STATEMENT**

455 This study is internally funded by the Division of Physical Therapy, Department of  
 456 Rehabilitation Medicine, Medical School, University of Minnesota. The research is  
 457 supported by the National Institutes of Health's National Center for Advancing  
 458 Translational Sciences, grant UL1TR002494. The content is solely the responsibility of  
 459 the authors and does not necessarily represent the official views of the National  
 460 Institutes of Health's National Center for Advancing Translational Sciences. The funders  
 461 have no role in study design, data collection, and analysis, decision to publish, or  
 462 preparation of the manuscript.



## FIGURE LEGENDS

**Figure 1.** Study flow chart

**Figure 2.** Depiction of the Five Element Qigong Healing Movements from Spring Forest Qigong.

*Legend:* The five movements are presented from left to right. Movement 1: Moving of Yin and Yang; Movement 2: Breathing of the Universe; Movement 3: Connecting with Heaven & Earth; Movement 4: Connecting with Your Body's Energy; Movement 5: Connecting with Your Heart's Energy. Details of how the different movements are performed are presented in the text.

## REFERENCES

- 1 Burke D, Fullen BM, Stokes D, *et al.* Neuropathic pain prevalence following spinal cord injury: A systematic review and meta-analysis. *Eur J Pain* 2017;**21**:29–44.
- 2 Gibbs K, Beaufort A, Stein A, *et al.* Assessment of pain symptoms and quality of life using the International Spinal Cord Injury Data Sets in persons with chronic spinal cord injury. *Spinal Cord Ser Cases* 2019;**5**:32.
- 3 Spotlight: Improving Care for Veterans with Spinal Cord Injuries and Disorders. 2006.<https://www.hsrd.research.va.gov/news/feature/sci.cfm?ID=1160> (accessed 6 Aug 2020).
- 4 Hatch MN, Cushing TR, Carlson GD, *et al.* Neuropathic pain and SCI: Identification and treatment strategies in the 21st century. *J Neurol Sci* 2018;**384**:75–83.
- 5 Solstrand Dahlberg L, Becerra L, Borsook D, *et al.* Brain changes after spinal cord injury, a quantitative meta-analysis and review. *Neurosci Biobehav Rev* 2018;**90**:272–93.
- 6 Nees TA, Finnerup NB, Blesch A, *et al.* Neuropathic pain after spinal cord injury: the impact of sensorimotor activity. *Pain* 2017;**158**:371–6.
- 7 Siddall PJ, Middleton JW. Spinal cord injury-induced pain: mechanisms and treatments. *Pain Manag* 2015;**5**:493–507.
- 8 Kaushal M, Oni-Orisan A, Chen G, *et al.* Evaluation of Whole-Brain Resting-State Functional Connectivity in Spinal Cord Injury: A Large-Scale Network Analysis Using Network-Based Statistic. *J Neurotrauma* 2017;**34**:1278–82.
- 9 Wang W, Xie W, Zhang Q, *et al.* Reorganization of the brain in spinal cord injury: a

- meta-analysis of functional MRI studies. *Neuroradiology* Published Online First: 16 August 2019. doi:10.1007/s00234-019-02272-3
- 10 Leemhuis E, De Gennaro L, Pazzaglia AM. Disconnected Body Representation: Neuroplasticity Following Spinal Cord Injury. *J Clin Med Res* 2019;**8**. doi:10.3390/jcm8122144
- 11 Lenggenhager B, Pazzaglia M, Scivoletto G, *et al*. The sense of the body in individuals with spinal cord injury. *PLoS One* 2012;**7**:e50757.
- 12 Pozeg P, Palluel E, Ronchi R, *et al*. Virtual reality improves embodiment and neuropathic pain caused by spinal cord injury. *Neurology* 2017;**89**:1894–903.
- 13 Vastano R, Costantini M, Widerstrom-Noga E. Maladaptive reorganization following SCI: The role of body representation and multisensory integration. *Prog Neurobiol* 2022;**208**:102179.
- 14 Mehling WE, Wrubel J, Daubenmier JJ, *et al*. Body Awareness: a phenomenological inquiry into the common ground of mind-body therapies. *Philos Ethics Humanit Med* 2011;**6**:6.
- 15 Coleman JF. Spring Forest Qigong and chronic pain: making a difference. *J Holist Nurs* 2011;**29**:118–28; quiz 129–31.
- 16 Lynch M, Sawynok J, Hiew C, *et al*. A randomized controlled trial of qigong for fibromyalgia. *Arthritis Res Ther* 2012;**14**:R178.
- 17 Klein P, Picard G, Baumgarden J, *et al*. Meditative Movement, Energetic, and Physical Analyses of Three Qigong Exercises: Unification of Eastern and Western Mechanistic Exercise Theory. *Medicines (Basel)* 2017;**4**.

doi:10.3390/medicines4040069

- 18 Taylor SM, Cheung EO, Sun R, *et al.* Applications of complementary therapies during rehabilitation for individuals with traumatic Spinal Cord Injury: Findings from the SCIRehab Project. *J Spinal Cord Med* 2019;**42**:571–8.
- 19 Zou L, Zhang Y, Yang L, *et al.* Are Mindful Exercises Safe and Beneficial for Treating Chronic Lower Back Pain? A Systematic Review and Meta-Analysis of Randomized Controlled Trials. *J Clin Med Res* 2019;**8**. doi:10.3390/jcm8050628
- 20 Phattharasupharerk S, Purepong N, Eksakulkla S, *et al.* Effects of Qigong practice in office workers with chronic non-specific low back pain: A randomized control trial. *J Bodyw Mov Ther* 2019;**23**:375–81.
- 21 Curtis K, Hitzig SL, Bechsgaard G, *et al.* Evaluation of a specialized yoga program for persons with a spinal cord injury: a pilot randomized controlled trial. *J Pain Res* 2017;**10**:999–1017.
- 22 Shem K, Karasik D, Carufel P, *et al.* Seated Tai Chi to alleviate pain and improve quality of life in individuals with spinal cord disorder. *J Spinal Cord Med* 2016;**39**:353–8.
- 23 Kuan S-C, Chen K-M, Wang C. Effectiveness of Qigong in Promoting the Health of Wheelchair-Bound Older Adults in Long-Term Care Facilities. *Biological Research For Nursing*. 2012;**14**:139–46. doi:10.1177/1099800411399645
- 24 Hanley MA, Jensen MP, Ehde DM, *et al.* Clinically significant change in pain intensity ratings in persons with spinal cord injury or amputation. *Clin J Pain* 2006;**22**:25–31.

- 25 Home Page - NSCISC Application. <https://www.nscisc.uab.edu/> (accessed 6 Aug 2020).
- 26 Data by Topic: Age, Race & Ethnicity. <https://mn.gov/admin/demography/data-by-topic/age-race-ethnicity/> (accessed 6 Aug 2020).
- 27 Folstein MF, Folstein SE, McHugh PR. 'Mini-mental state': a practical method for grading the cognitive state of patients for the clinician. *J Psychiatr Res* 1975;**12**:189–98.
- 28 Malouin F, Richards CL, Jackson PL, *et al*. The Kinesthetic and Visual Imagery Questionnaire (KVIQ) for assessing motor imagery in persons with physical disabilities: a reliability and construct validity study. *J Neurol Phys Ther* 2007;**31**:20–9.
- 29 User S. Courses - Five Element Healing Movements. <https://www.springforestqigong.com/shop/healing-tools-courses/five-element-healing-movements-store> (accessed 10 Feb 2022).
- 30 Dworkin RH, Turk DC, Farrar JT, *et al*. Core outcome measures for chronic pain clinical trials: IMMPACT recommendations. *Pain* 2005;**113**:9–19.
- 31 Bryce TN, Budh CN, Cardenas DD, *et al*. Pain after spinal cord injury: an evidence-based review for clinical practice and research. Report of the National Institute on Disability and Rehabilitation Research Spinal Cord Injury Measures meeting. *J Spinal Cord Med* 2007;**30**:421–40.
- 32 Widerström-Noga E, Biering-Sørensen F, Bryce TN, *et al*. The International Spinal Cord Injury Pain Basic Data Set (version 2.0). *Spinal Cord* 2014;**52**:282–6.

- 561 33 Mills PB, Vakil AP, Phillips C, *et al.* Intra-rater and inter-rater reliability of the Penn  
562 Spasm Frequency Scale in People with chronic traumatic spinal cord injury. *Spinal*  
563 *Cord* 2018;**56**:569–74.
- 564 34 Fann JR, Bombardier CH, Richards JS, *et al.* Depression after spinal cord injury:  
565 comorbidities, mental health service use, and adequacy of treatment. *Arch Phys*  
566 *Med Rehabil* 2011;**92**:352–60.
- 567 35 Krause JS, Reed KS, McArdle JJ. Factor Structure and Predictive Validity of  
568 Somatic and Nonsomatic Symptoms From the Patient Health Questionnaire-9: A  
569 Longitudinal Study After Spinal Cord Injury. *Archives of Physical Medicine and*  
570 *Rehabilitation*. 2010;**91**:1218–24. doi:10.1016/j.apmr.2010.04.015
- 571 36 Bombardier CH, Richards JS, Krause JS, *et al.* Symptoms of major depression in  
572 people with spinal cord injury: implications for screening. *Arch Phys Med Rehabil*  
573 2004;**85**:1749–56.
- 574 37 Krause JS, Saunders LL, Reed KS, *et al.* Comparison of the Patient Health  
575 Questionnaire and the Older Adult Health and Mood Questionnaire for self-reported  
576 depressive symptoms after spinal cord injury. *Rehabil Psychol* 2009;**54**:440–8.
- 577 38 Kroenke K, Spitzer RL, Williams JB. The PHQ-9: validity of a brief depression  
578 severity measure. *J Gen Intern Med* 2001;**16**:606–13.
- 579 39 Julian LJ. Measures of anxiety: State-Trait Anxiety Inventory (STAI), Beck Anxiety  
580 Inventory (BAI), and Hospital Anxiety and Depression Scale-Anxiety (HADS-A).  
581 *Arthritis Care & Research*. 2011;**63**:S467–72. doi:10.1002/acr.20561
- 582 40 Jang Y, Hsieh C-L, Wang Y-H, *et al.* A validity study of the WHOQOL-BREF

- assessment in persons with traumatic spinal cord injury. *Arch Phys Med Rehabil* 2004;**85**:1890–5.
- 41 Hill MR, Noonan VK, Sakakibara BM, *et al*. Quality of life instruments and definitions in individuals with spinal cord injury: a systematic review. *Spinal Cord* 2010;**48**:438–50.
- 42 Lin M-R, Hwang H-F, Chen C-Y, *et al*. Comparisons of the Brief Form of the World Health Organization Quality of Life and Short Form-36 for Persons With Spinal Cord Injuries. *American Journal of Physical Medicine & Rehabilitation*. 2007;**86**:104–13. doi:10.1097/01.phm.0000247780.64373.0e
- 43 Diener E, Emmons RA, Larsen RJ, *et al*. The Satisfaction With Life Scale. *Journal of Personality Assessment*. 1985;**49**:71–5. doi:10.1207/s15327752jpa4901\_13
- 44 Middleton JW, Tran Y, Lo C, *et al*. Reexamining the Validity and Dimensionality of the Moorong Self-Efficacy Scale: Improving Its Clinical Utility. *Arch Phys Med Rehabil* 2016;**97**:2130–6.
- 45 Middleton JW, Tate RL, Geraghty TJ. Self-Efficacy and Spinal Cord Injury: Psychometric Properties of a New Scale. *Rehabil Psychol* 2003;**48**:281–8.
- 46 Miller SM. The measurement of self-efficacy in persons with spinal cord injury: psychometric validation of the moorong self-efficacy scale. *Disabil Rehabil* 2009;**31**:988–93.
- 47 Buysse DJ, Reynolds CF 3rd, Monk TH, *et al*. The Pittsburgh Sleep Quality Index: a new instrument for psychiatric practice and research. *Psychiatry Res* 1989;**28**:193–213.

- 48 Dragesund T, Strand LI, Grotle M. The Revised Body Awareness Rating  
Questionnaire: Development Into a Unidimensional Scale Using Rasch Analysis.  
*Phys Ther* 2018;**98**:122–32.
- 49 Cramer H, Mehling WE, Saha FJ, *et al.* Postural awareness and its relation to pain:  
validation of an innovative instrument measuring awareness of body posture in  
patients with chronic pain. *BMC Musculoskelet Disord* 2018;**19**:109.
- 50 Alleva JM, Tylka TL, Kroon Van Diest AM. The Functionality Appreciation Scale  
(FAS): Development and psychometric evaluation in U.S. community women and  
men. *Body Image* 2017;**23**:28–44.
- 51 Mehling WE, Price C, Daubenmier JJ, *et al.* The Multidimensional Assessment of  
Interoceptive Awareness (MAIA). *PLoS One* 2012;**7**:e48230.
- 52 Porges S. Body perception questionnaire: Laboratory of Developmental  
Assessment University of Maryland. *Pridobljeno* 1993;**15**:2009.
- 53 Cabrera A, Kolacz J, Pailhez G, *et al.* Assessing body awareness and autonomic  
reactivity: Factor structure and psychometric properties of the Body Perception  
Questionnaire-Short Form (BPQ-SF). *Int J Methods Psychiatr Res* Published  
Online First: 2017. doi:10.1002/mpr.1596
- 54 Krassioukov A, Biering-Sørensen F, Donovan W, *et al.* International standards to  
document remaining autonomic function after spinal cord injury. *J Spinal Cord Med*  
2012;**35**:201–10.
- 55 Slavin MD, Ni P, Tulskey DS, *et al.* Spinal Cord Injury–Functional Index/Assistive  
Technology Short Forms. *Arch Phys Med Rehabil* 2016;**97**:1745–52.e7.



- 56 Keeney T, Slavin M, Kisala P, *et al.* Sensitivity of the SCI-FI/AT in Individuals With Traumatic Spinal Cord Injury. *Arch Phys Med Rehabil* 2018;**99**:1783–8.
- 57 Westaway MD, Stratford PW, Binkley JM. The patient-specific functional scale: validation of its use in persons with neck dysfunction. *J Orthop Sports Phys Ther* 1998;**27**:331–8.
- 58 Jörgensen S, Martin Ginis KA, Lexell J. Leisure time physical activity among older adults with long-term spinal cord injury. *Spinal Cord* 2017;**55**:848–56.
- 59 Martin Ginis KA, Phang SH, Latimer AE, *et al.* Reliability and Validity Tests of the Leisure Time Physical Activity Questionnaire for People With Spinal Cord Injury. *Arch Phys Med Rehabil* 2012;**93**:677–82.
- 60 Kori SH, Miller RP, Todd DD. Kinesiophobia: A new view of chronic pain behavior. *Pain Management* 1990;:35–43.
- 61 Whiteneck GG, Charlifue SW, Gerhart KA, *et al.* Quantifying handicap: a new measure of long-term rehabilitation outcomes. *Arch Phys Med Rehabil* 1992;**73**:519–26.

# Study Design

**1. Screen and consent adults with SCI-related neuropathic pain and with paraplegia or tetraplegia**

**Excluded** (state reason)

**2. Baseline behavioral assessments over Zoom**

**3. Qigong practice**  
12 weeks, 3x/week,  
41min/session with online  
video + weekly follow-up on  
neuropathic pain intensity

**Withdrawal/drop-out/adverse  
event** (state reason)

**4. Mid-practice behavioral assessments over Zoom  
(6 weeks of Qigong practice)**

**5. End of practice behavioral assessments over Zoom  
(12 weeks of Qigong practice)**

**6. 6-weeks Follow-up**  
No Qigong practice +  
weekly follow-up on  
neuropathic pain intensity

**7. End of study behavioral assessments over Zoom**

**8. Statistical analysis**

# 5 Elements

QIGONG FOR SELF HEALING

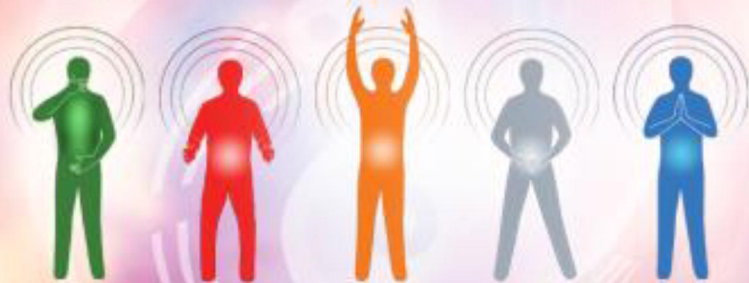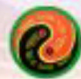

SPRING FOREST  
QIGONG
